# Supplementary material
Source: PubMed Central journal article supplement (PMC10330894)

# Male Control

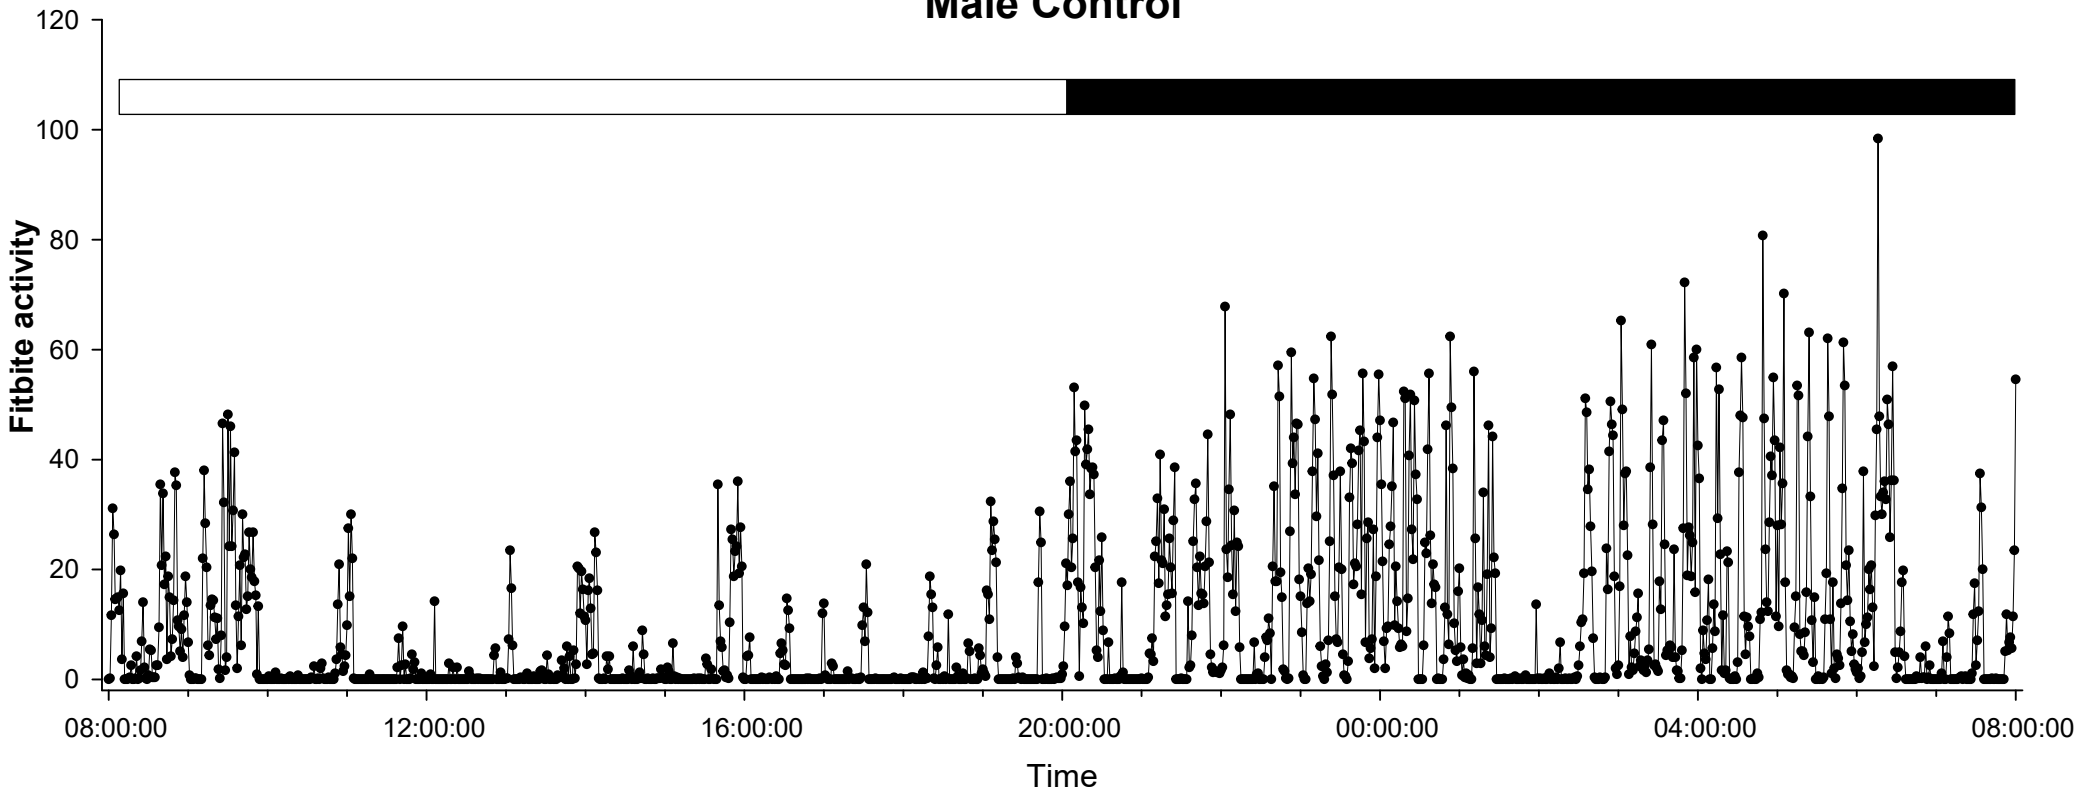

Supplement: NIHMS1890504-supplement-fS1.pdf [file NIHMS1890504-supplement-fS1.pdf]

# Female control

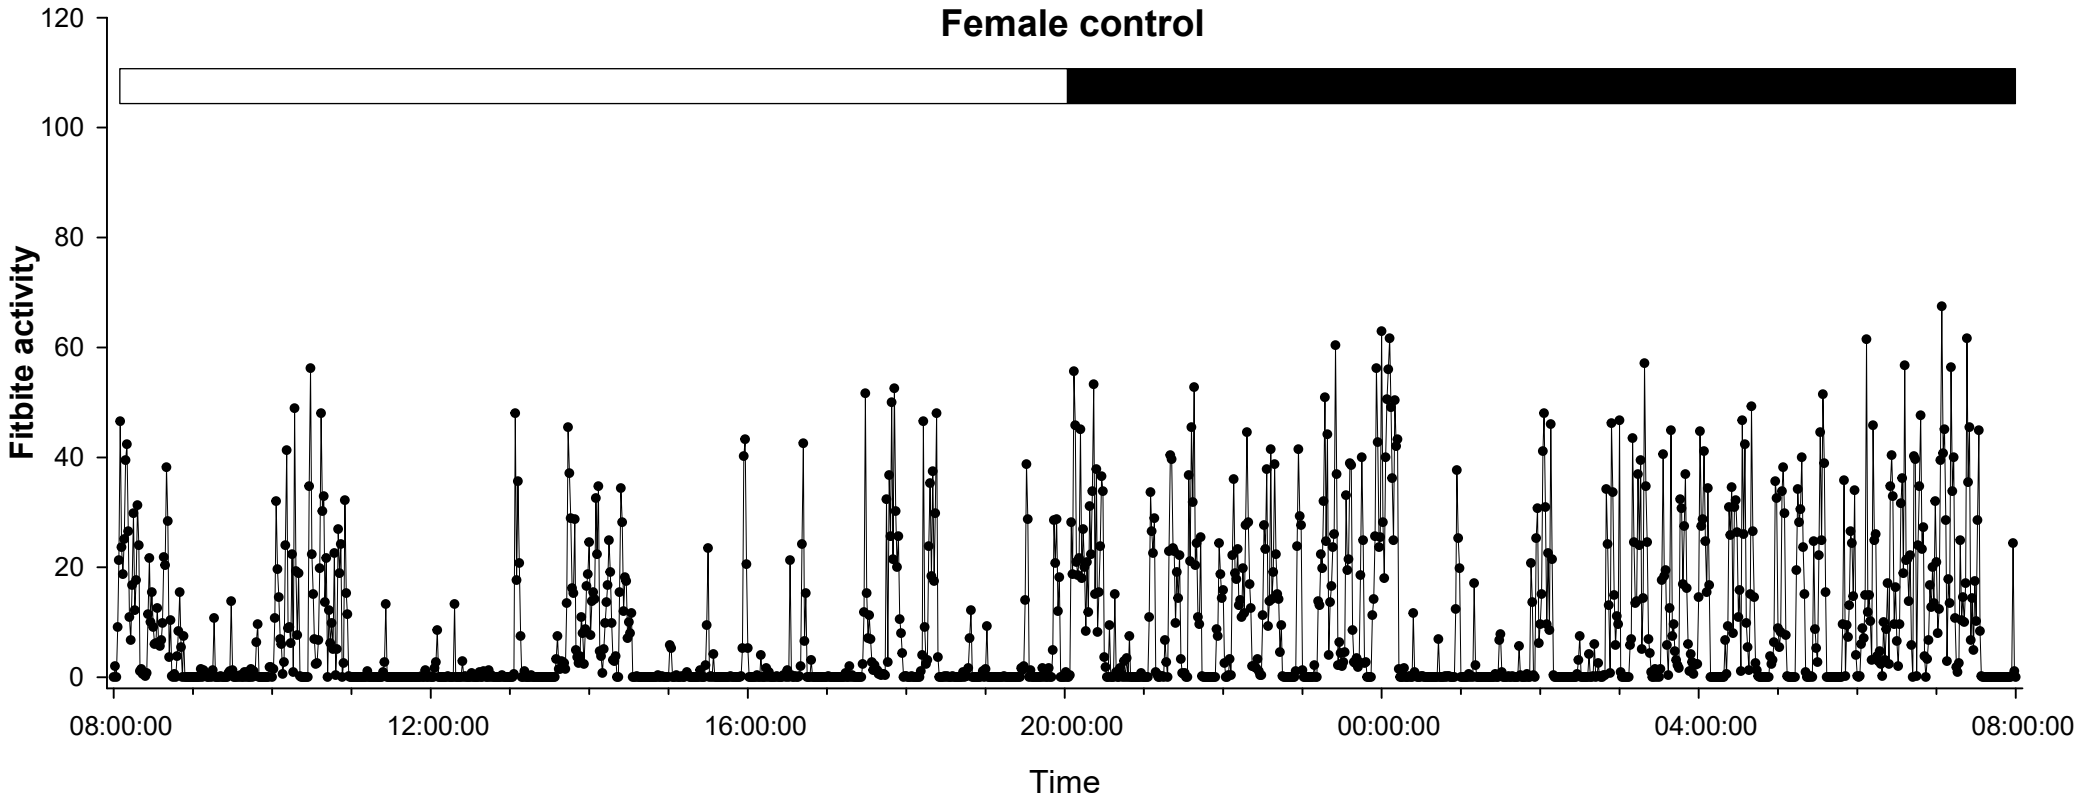

Supplement: NIHMS1890504-supplement-fS2.pdf [file NIHMS1890504-supplement-fS2.pdf]
